# Supplementary material for: Droplet morphometry and velocimetry (DMV): a video processing software for time-resolved, label-free tracking of droplet parameters
Source: Royal Society of Chemistry journal article supplement (doi:10.1039/c3lc50074h), 2013-01-01
Supplement: c3lc50074h.pdf [file c3lc50074h.pdf]

## Supplementary Information

1. Researchers interested in obtaining the DMV software may contact the author at [abasu@eng.wayne.edu](mailto:abasu@eng.wayne.edu). A video demonstration and tutorial of the software, along with related documentation, can be found on the author's website at <http://microfluidics.wayne.edu>.
2. The following DMV settings were used in sample videos.

| Video                  | FPS   | Length scale | ROI                | Background image                    | Subtraction Method    | Edge Detection  | Small Object removal | Fill and Close | Circle Detection | Movie Frames | Distance Match | Area Match |
|------------------------|-------|--------------|--------------------|-------------------------------------|-----------------------|-----------------|----------------------|----------------|------------------|--------------|----------------|------------|
| Drop generator         | 5000  | 0.75         | [1 200 1280 320]   | Mode, all frames 1-196              | Absolute Difference   | Threshold 0.1   | 1000, DBO            | 0              | 0.5              | 1-196        | 0.7            | 0.2        |
| Drop splitter          | 4000  | N/A          | [199 99 172 148]   | Min, 1-100                          | Standard w/ Inversion | Threshold, .62  | 100, DBO             | 2              | 0.3              | 1-790        | 1.2            | 0.2        |
| Drop merging           | 10000 | 1.68         | [1 1 704 160]      | Manually generated empty channel    | Absolute Difference   | Threshold, .038 | 100, DBO             | 10             | 0.1              | 1-459        | 3              | 0.1        |
| Cell encapsulation A   | N/A   | N/A          | [864 278 393 112]  | None                                | Absolute Difference   | Threshold, 0.62 | 400, DBO             | 1              | 0.2              | 1-864        | 1.2            | 0.2        |
| Cell encapsulation B   | 10000 | 1.78         | [283 85 50 40]     | Mode, frames 1-200                  | Absolute Difference   | Sobel, .025     | 20, DBO              | 1              | 0.5              | 1-1809       | 1.2            | 0.5        |
| Drop dilutor           | N/A   | N/A          | [416 345 93 221]   | Average, frame 1                    | Absolute Difference   | Sobel, 0.02     | 100, DBO             | 10             | 0.5              | 1-491        | 2              | 0.4        |
| Tensiophoresis sorting | 30    | 4            | [344 209 450 313]  | Average of frame 45 (empty channel) | Standard w/ Inversion | Threshold, 0.52 | 2000, DBO            | 0              | 0.65             | 1-11946      | 10             | 0.7        |
| Serpentine channel     | 352   | 1.48         | [430 448 1056 411] | Min function, all frames            | Standard              | Threshold, 0.55 | 200, DBO             | 0              | 0.6              | 406          | 1.2            | 0.5        |
| Drop reinjector        | 7116  | 7            | [1 1 490 129]      | Manually generated, dark channel    | Standard              | Threshold, .8   | 30, DBO              | 0              | 0.65             | 417          | 10             | 0.7        |
